# Supplementary material for: Pilot study evaluating everolimus molecular mechanisms in tuberous sclerosis complex and focal cortical dysplasia
Source: PLoS One. 2022 May 19;17(5):e0268597. doi: 10.1371/journal.pone.0268597 (PMC9119437; doi:10.1371/journal.pone.0268597)
Supplement: S5 Table — (XLSX) [file pone.0268597.s005.xlsx]

## Sheet: S5 Table
S5 Table. LC-MS/MS Plasma Sample DIA Settings
window	start_mz	end_mz	center	width
1	350	384	367	34
2	383	411	397	28
3	410	436	423	26
4	435	460	447.5	25
5	459	482	470.5	23
6	481	504	492.5	23
7	503	527	515	24
8	526	548	537	22
9	547	571	559	24
10	570	593	581.5	23
11	592	616	604	24
12	615	640	627.5	25
13	639	666	652.5	27
14	665	693	679	28
15	692	723	707.5	31
16	722	755	738.5	33
17	754	791	772.5	37
18	790	834	812	44
19	833	885	859	52
20	884	956	920	72
21	955	1071	1013	116
22	1070	1650	1360	580
